## Harnessing optogenetics to probe sub-cellular mechanics

Patrick W. Oakes<sup>1,4\*</sup>, Elizabeth Wagner<sup>2\*</sup>, Christoph A. Brand<sup>3+</sup>, Dimitri Probst<sup>3+</sup>, Marco Linke<sup>3+</sup>, Ulrich S. Schwarz<sup>3\*</sup>, Michael Glotzer<sup>2\*</sup>, Margaret L. Gardel<sup>1\*</sup>

<sup>1</sup>Institute for Biophysical Dynamics, James Franck Institute and the Department of Physics, University of Chicago, Chicago, IL 606037

<sup>2</sup>Department of Molecular Genetics and Cell Biology, University of Chicago, Chicago, IL 60637

<sup>3</sup>Institute for Theoretical Physics and BioQuant, Heidelberg University, Heidelberg, Germany

<sup>4</sup>Department of Physics & Astronomy, and Department of Biology, University of Rochester, Rochester, NY 14627

<sup>\*,+</sup>Contributed equally

\*Corresponding Authors

1 **Abstract**

2 The mechanics of the actin cytoskeleton regulates cell morphogenesis during essential physiological  
3 processes. However, the spatially heterogeneous and dynamic nature of the actin cytoskeleton make  
4 mechanical measurements and modeling challenging. Here we develop a new approach to probe the  
5 mechanics of the contractile actin cytoskeleton by integrating optogenetic control of RhoA, live cell  
6 imaging and traction force microscopy. Local activation of RhoA stimulates local contraction, leading to  
7 increased traction forces that rapidly propagate across the cell via stress fibers and drive actin flow  
8 towards the region of heightened RhoA. Surprisingly, the flow reverses direction when local RhoA  
9 activation stops. These experimental data are used to constrain a physical model, which demonstrates  
10 that stress fibers are elastic-like, even at time scales exceeding turnover of constituent proteins. We  
11 identify zyxin as a regulator of stress fiber mechanics, as they are fluid-like in its absence. Such  
12 molecular control of actin mechanics likely plays critical roles in regulation of morphogenic events.

## 13 Introduction

14 A diverse array of essential physiological processes, ranging from the subcellular to the multicellular,  
15 depend on the spatial and temporal regulation of contractile forces<sup>1-4</sup>. This regulation drives changes in  
16 cell shape<sup>5,6</sup> and mediates interactions with the extracellular environment<sup>7,8</sup>. Changes in contractility  
17 can furthermore alter gene expression<sup>9</sup> and impact development<sup>10,11</sup>. The molecular machinery  
18 required for generating contractile forces is well conserved and dominated by the actin cytoskeleton,  
19 myosin II activity and associated regulatory proteins<sup>4,12,13</sup>. Specifically, actin filaments dynamically  
20 organize into distinct contractile architectures, including the cortex and stress fibers<sup>14,15</sup>. Contractile  
21 forces are transmitted across the cell by actin arrays and are ultimately to the extracellular matrix by  
22 focal adhesions<sup>12,13,16,17</sup>.

23  
24 The regulation of cellular force transmission is controlled by the mechanical properties of actomyosin  
25 assemblies. Cellular mechanics has been explored extensively both experimentally<sup>14,18-20</sup> and  
26 theoretically<sup>21-23</sup>. Current understanding is that, at time scales comparable to those of typical kinetic  
27 processes, the actin cytoskeleton behaves like an elastic solid. Such elasticity enables rapid force  
28 transmission across the cell and reversible deformations to preserve cytoskeletal architecture. In  
29 contrast, at longer time scales, it is thought dynamic processes make the cytoskeleton predominately  
30 like a viscous fluid. Such viscosity enables cytoskeletal flows and remodeling. However, the molecular  
31 regulation of cell mechanics is not well understood.

32  
33 Cellular contractility is largely controlled by the activity of the small GTPase RhoA<sup>24,25</sup>, which in  
34 adherent cells is preferentially active at the cell periphery<sup>26,27</sup>. RhoA regulates contractility through the  
35 promotion of actin polymerization and myosin light chain phosphorylation via the downstream  
36 effectors Diaphanous-related formins and Rho-associated Kinase (ROCK), respectively. RhoA activity is  
37 required for stress fibers and focal adhesions<sup>24,25</sup>. Little, however, is known about how small changes in  
38 activity can regulate cell contractility, actin architecture and adhesion.

39  
40 In this paper, we have used an optogenetic probe to locally activate RhoA in adherent fibroblasts.  
41 Plasma membrane recruitment of the RhoA specific guanine exchange factor (GEF) LARG induces local

42 RhoA activation<sup>6,28-30</sup>. Local activation of RhoA leads to an increase in actin polymerization and myosin  
43 activity in the region of activation, but it does not stimulate *de novo* stress fiber formation or changes  
44 in focal adhesion morphology. We find that exogenous RhoA activation leads to an immediate increase  
45 in both the local and global contractility of the cell, followed by a rapid relaxation after GEF  
46 recruitment is stopped. The local increase in stress fiber contractility drives an actomyosin flow  
47 towards regions of increased RhoA activity. Surprisingly, these flows reverse direction as soon as GEF  
48 recruitment ceases. Using physical modeling, we show this behavior is consistent with stress fibers  
49 behaving as predominately elastic-like over hour time scales. We find that zyxin is necessary for this  
50 elasticity; in its absence, stress fibers become predominately fluid-like even at second time scales.  
51 These results suggest that stress fiber mechanics is sensitive to small changes in composition, which  
52 has significant implications for regulation of force transmission and cytoskeletal organization.

53

## 54 **Results**

### 55 **Spatiotemporal control of RhoA and its downstream effectors**

56 To spatially and temporally control contractility in adherent cells, we adapted a previously established  
57 optogenetic probe<sup>6,28</sup> to act on the RhoA signaling pathway (Figure 1a). During stimulation by blue  
58 light, a cytosolic fusion protein, photo-recruitable GEF (prGEF), consisting of tandem PDZ domains  
59 fused to the DH domain of the RhoA specific GEF LARG<sup>6</sup>, is recruited to the plasma membrane where it  
60 activates RhoA (Figure 1b). To illustrate the local recruitment of prGEF we tagged it with the  
61 fluorophore mCherry and imaged an NIH 3T3 fibroblast expressing the constructs on a glass coverslip  
62 (Figure 1c). A digital micromirror device was used to spatially control the illumination of the blue  
63 activating light (orange box, Figure 1c), and was pulsed before each image acquisition during the  
64 recruitment period. Recruitment of the prGEF to the activation region was rapid and reversible upon  
65 extinguishing the stimulating blue light (Figure 1c,d and Supplementary Movie 1).

66

67 To investigate whether recruitment of the prGEF resulted in activity of proteins downstream of RhoA,  
68 we tracked the dynamics of actin and myosin light chain (MLC) during recruitment (Figure 1e,g). Both  
69 actin and myosin accumulated in the activation regions, resulting in an increase in fluorescence  
70 intensity during the 15 min activation period (Figure 1e-h and Supplementary Movies 2-3).

71 Interestingly, local activation of RhoA did not lead to *de novo* stress fiber assembly in the activation  
72 region (Figure 1e and Supplementary Movie 2). At the end of the activation period, fluorescence  
73 intensities of both actin and myosin returned to baseline levels. These results indicate that exogenous  
74 RhoA activation via LARG recruitment is not sufficient to maintain elevated RhoA activity and the  
75 concomitant increases in local actin and myosin concentrations. To confirm that local activation of  
76 RhoA was acting on actin and myosin through its downstream effectors, formin and ROCK, the  
77 experiments were repeated in the presence of either SMIFH2, a pan formin inhibitor<sup>31</sup>, or Y-27632, a  
78 Rho-associated Kinase inhibitor. Local recruitment of actin and MLC were significantly inhibited by the  
79 presence of SMIFH2 and Y-27632, respectively. These results illustrate that RhoA activity and  
80 recruitment of its downstream effectors can be spatially and temporally controlled via light.

81

### 82 **Focal adhesion dynamics and morphology are unperturbed by local increases in RhoA activity**

83 Previous work has suggested that focal adhesion formation and maturation are tension dependent  
84 processes driven by increased RhoA activity at adhesion sites<sup>24,25,32</sup>. To test these hypotheses we  
85 examined how local RhoA activation affected traction forces and focal adhesions. Cells expressing  
86 mCherry-vinculin, a marker of focal adhesions, were plated on polyacrylamide gels coated with  
87 fibronectin and traction stresses were measured via Traction Force Microscopy (Figure 2a,b and  
88 Supplementary Movie 4)<sup>33,34</sup>. During local activation of RhoA, traction stresses increased at focal  
89 adhesion sites, on a similar timescale to that of myosin localization (Figure 1g). Despite the increased  
90 force, the total number of adhesions remained essentially constant (Figure 2c). Individual adhesion  
91 morphology and vinculin intensity were also unaffected, despite large increases in stress at a majority  
92 of previously established adhesion sites during local RhoA activation (Figure 2d & Supplementary  
93 Figure S1). Too much RhoA activation, however, results in adhesion failure and detachment from the  
94 substrate (Supplementary Figure S2). These results are consistent with previous results that tension  
95 alone is not sufficient to drive changes in focal adhesion size<sup>35</sup>.

96

97 To determine the effect of local RhoA activation on the overall contractility of the cell, we used traction  
98 force microscopy to measure the total strain energy, which reflects the amount of mechanical work  
99 done by the cell on its environment<sup>36</sup>. Activation induced a rapid increase in both traction stresses and

100 strain energy (Figure 2b,c) At the end of the activation period, the strain energy decreased to their  
101 original baseline values (Figure 2c). Interestingly, traction stresses were mostly seen to increase at the  
102 cell periphery, where traction stresses were already established, and in areas immediately adjacent to  
103 the activation region. No change was seen in the activation area itself (Figure 2b). This suggests that  
104 locally generated forces balance within the activation region and only unbalanced forces at the edge of  
105 this region are turned into productive traction forces. Thus, a local increase of tension leads to globally  
106 distributed traction forces at pre-existing focal adhesions.

107

### 108 **Cells maintain a contractile set point**

109 That cells return to a similar baseline contractility following a period of exogenous RhoA activation is  
110 consistent with previously established ideas of tensional homeostasis<sup>36-38</sup>. To explicitly probe this  
111 behavior, we performed a series of local activations of different sizes on a single cell (Figure 2e and  
112 Supplementary Movie 5). After measuring the strain energy at an initial steady state, a cell was  
113 exposed to three 15 min periods of local RhoA activation of increasing size with relaxation periods  
114 between each activation (Figure 2e,f). The strain energy increased concomitant with the size of the  
115 activation region. During activation, both local stresses immediately surrounding the activation region,  
116 and long-range stresses at the cell periphery could be seen to increase (Figure 2e). Following each  
117 activation, the strain energy returned to the initial baseline level (Figure 2f).

118

119 To elucidate the underlying mechanical principles, we built a physical model that would capture this  
120 physical response. We constructed a continuum model of the cell as a contractile element in series  
121 with a viscous and an elastic element (Figure 2g). Contractility was assumed to increase with an  
122 exponentially plateauing ramp in the activated region, consistent with the observed accumulation  
123 profiles for actin and myosin (Figure 1g), and the substrate was represented as an elastic spring  
124 coupled to the cell by a friction element. The model parameters for the elastic modulus, viscosity,  
125 friction and contractility were found by fitting the model to the strain energy data, while the value of  
126 the substrate stiffness was fixed. This procedure resulted in a curve in good agreement with the  
127 experimental data (Figure 2f).

128

129 We find that both the viscous and elastic elements are necessary to accurately capture the behavior of  
130 the system. The ratio of viscosity ( $\sim 7 \cdot 10^6$  Pa\*s) to elasticity ( $\sim 2 \cdot 10^3$  Pa) defines a viscoelastic  
131 relaxation time of approximately 50 minutes; this time scale determines the transition from when the  
132 cytoskeleton behaves predominately elastic-like ( $< 50$  min) to predominately fluid-like ( $> 50$  min). Our  
133 results thus indicate that stress fibers are predominantly elastic on the scale of tens of minutes, despite  
134 proteins within the stress fiber turning over on timescales of tens of seconds<sup>15</sup>. This strong elastic  
135 behavior is also consistent with the immediate increase in cell traction stresses at the cell periphery  
136 (Figure 2b,e) upon local activation of RhoA in the center of the cell.

137

### 138 **Stress fibers contract independent of the background network**

139 To investigate the cytoskeletal architectures that give rise to this strong contractility, we tracked  
140 myosin dynamics during local RhoA activation. In the steady state, as new actomyosin is polymerized  
141 and incorporated into stress fibers, there is a retrograde flow of actomyosin from the periphery  
142 towards the cell center<sup>15,17</sup>. Using particle image velocimetry (PIV)<sup>39,40</sup> we measured both the local  
143 direction and magnitude of myosin flow. We found that myosin flow rates along the stress fiber  
144 increased as myosin accumulated in the activation region creating a local contraction, and that this  
145 flow was directed along the orientation of the stress fibers spanning the activation region (Figure 3a,b,  
146 Supplementary Figure S3, and Supplementary Movie 6). The flow direction was independent of the  
147 activation region geometry, with the direction always being determined by the stress fiber orientation  
148 (Supplementary Movie 7).

149

150 The cytoskeleton of a strongly adherent cell is typically thought to be a 2D material comprised of stress  
151 fibers embedded in an isotropic cortex<sup>34,41,42</sup>. Since flows induced by local RhoA activation appear to  
152 track the orientation of the stress fibers (Figs. 3a,b and S2), we sought to address the relative  
153 contractile contributions of the stress fibers and the actin networks. We therefore built a 2D discrete  
154 model analogous to the 1D continuum model described above (Figure 3c). The model consists of a  
155 triangular mesh with the same contractile, viscous and elastic elements connected in series, with lines  
156 of increased contractility representing the stress fibers. Using a simple rectangular cell, we first verified  
157 that, without stress fibers, this model recapitulates the results from the one-dimensional continuum

158 model (Figure 3d). Similar to the 1D model above, the contractile components in a region in the center  
159 of the cell were slowly increased with an exponentially plateauing ramp. The parameters were then  
160 adjusted so that the model both qualitatively and quantitatively recapitulated the expected flow  
161 patterns of the 1D continuum model (Figure 3d).

162  
163 To explore the relative contributions of the background mesh and the stress fibers, we considered two  
164 test cases: (1) If both the mesh and the stress fibers contained contractile elements, the stress fibers  
165 pinched inward transverse to their orientation during local activation (Figure 3e); and (2) when  
166 contractile elements were only included in the stress fibers, the cytoskeletal flow was restricted to  
167 directions along the stress fiber (Figure 3f), consistent with our experimental results (Figure 3a-b,  
168 Supplementary Figure S3, and Supplementary Movies 6-7). Since transverse deformations were never  
169 seen in experiments, it is clear that the stress fibers must be the predominant contractile elements  
170 observable at this resolution which respond to local RhoA-induced contractions. Furthermore, this  
171 result illustrates that it is appropriate to think of a stress fiber as a one-dimensional contractile  
172 element with viscous and elastic components embedded in a passive viscoelastic network.

### 173 174 **Stress fibers flow in response to local strain induced by RhoA activation**

175 Having identified the stress fiber as the main contractile unit responding to exogenous RhoA activation,  
176 we next sought to address whether stress fibers undergo deformation during contraction. Since stress  
177 fibers can be considered as 1D structures, we analyzed myosin flow along the fiber using kymographs.  
178 A kymograph drawn along a single stress fiber illustrates that myosin puncta flowed from both ends  
179 towards the activation regions when RhoA was activated locally (Figure 4a-b, Supplementary Figure  
180 S5). Similarly, a kymograph drawn by projecting the flow speed along the stress fiber from the velocity  
181 field created by our PIV analysis illustrates even more clearly how cytoskeletal flow was perturbed by  
182 local RhoA activation. Flow of myosin from both ends of the stress fiber reoriented towards the  
183 recruitment regions and increased from  $\sim 1$  nm/s on average to more than 3 nm/s during activation  
184 (Figure 4c and Supplementary Figure S5). Strikingly, the flow was also seen to reverse direction, flowing  
185 away from the recruitment region and towards the cell periphery, during the relaxation period  
186 following the local activation (Figure 4b,c). This flow reversal is reminiscent of the restoring force in



187 elastic objects that restores its original shape after removal of external force (e.g. recoil of an elastic  
188 band after stretch).

189

190 We next developed a protocol to measure the magnitude of the stress fiber displacement during these  
191 periods of contraction and relaxation (Figure 4d). The displacement in a given fiber was determined by  
192 measuring the relative position of puncta along the fiber following 15 minutes of local RhoA activation  
193 and 15 minutes after it ceased. During contraction, puncta on either side of the activation region  
194 contracted on average  $\sim 3 \mu\text{m}$  from their original position before relaxing back to  $\sim 1 \mu\text{m}$  from their  
195 original position (Figure 4d). The relaxation response across many stress fibers from multiple cells  
196 could be further clustered into two groups, one which exhibited strong reversal ( $\sim 80\%$  of the original  
197 position) and one which exhibited little to no reversal ( $\sim 25\%$  of the original position) (Figure 4d).

198

199 To determine whether stress fibers were stretching due to the local contraction, we used cells  
200 expressing mApple- $\alpha$ -actinin, an actin crosslinker which localizes to well defined puncta on stress fibers  
201 (Figure 4e and Supplementary Movie 8). We created kymographs of  $\alpha$ -actinin flow during local  
202 activation of RhoA and tracked paths of individual puncta (Figure 4f). The velocity of individual puncta  
203 was determined from the slope of the tracks in the kymograph and plotted as a function of distance  
204 from the activation zone (Figure 4g). Puncta along the stress fiber moved at similar speeds, indicating  
205 that, in general, the stress fiber was translating as a rigid rod during the local contraction (Figure 4g).  
206 Where present, changes in velocity between neighboring puncta were abrupt (blue arrow Fig 4g),  
207 suggesting points of structural failure along a fiber. These results indicate that the strain induced in the  
208 stress fiber is restricted to the local contraction in the activation region and discrete sites of extension  
209 in regions outside the activation region.

210

211 By fitting the experimental kymographs to both our 1D continuum and 2D discrete models, we show  
212 that similar flow patterns emerge naturally from the mechanics of the system (Figure 4h). The high  
213 elasticity of the stress fiber, specifically the ratio of elasticity to viscosity, is sufficient to recapitulate  
214 the flow profiles that were seen during both RhoA activation and relaxation. Furthermore, the

215 parameters found from the kymograph fitting process were consistent with the parameter values  
216 found when fitting the strain energy (Table 2).

217

### 218 **Zyxin is recruited to sites of extension and compression on stress fibers**

219 In order to probe the underlying molecular basis of this elasticity, we sought to identify stress fiber-  
220 associated proteins that could contribute to the recoil behavior. Zyxin has been previously established  
221 as a mechanosensitive protein that dynamically localizes to sites of strain along stress fibers<sup>43,44</sup>, in  
222 addition to focal adhesions<sup>45</sup>. Using cells expressing mCherry-zyxin, we monitored zyxin activity during  
223 RhoA activation (Figure 5a and Supplementary Movie 9). Zyxin recruitment was consistently observed  
224 in a small population of focal adhesions outside of the local activation region (Figure 5b). Surprisingly,  
225 we found that zyxin also accumulated along stress fibers in the region of local activation (Figure 5c,d).  
226 Given the myosin accumulation and direction of flow, this suggests that zyxin is recruited to both sites  
227 of compression and extension. Paxillin, another mechanosensitive LIM domain protein that responds  
228 to stress<sup>46,47</sup>, behaved similarly to zyxin (Supplementary Figure S4).

229

### 230 **Zyxin is required for stress fibers to behave elastically**

231 To further explore the role of zyxin in stress fiber mechanical behavior we used mouse embryonic  
232 fibroblast cells derived from zyxin<sup>-/-</sup> mice<sup>48</sup>. Despite the loss of zyxin, these cells form actin stress fibers  
233 and focal adhesions and are highly contractile<sup>49</sup>. When we locally activated RhoA in the zyxin<sup>-/-</sup> cells,  
234 myosin accumulated in the activation region (Figure 5e and Supplementary Movie 10). This  
235 accumulation drove a contractile flow into the local activation area that was indistinguishable from  
236 wild type cells. Upon stopping the GEF recruitment in zyxin<sup>-/-</sup> cells, cytoskeletal flow returned to pre-  
237 activation rates, consistent with the reduced local contraction, but did not reverse direction (Figure 5e-  
238 f,i, Supplementary Figure S5, and Supplementary Movie 10). Expression of EGFP-zyxin in this cell line  
239 restored the flow reversal (Figure 5g-i, Supplementary Figure S5 and Supplementary Movie 11).  
240 Together these results indicate that zyxin is required for the flow reversal occurring after local RhoA  
241 activation ends.

242

243 Using the kymographs produced in the *zyxin*<sup>-/-</sup> and *zyxin*<sup>-/-</sup>+EGFP-*zyxin* cells, we again fit the data to our  
244 mechanical model (Figure 5j-l, Supplementary Figure S6). For the *zyxin*<sup>-/-</sup> cells, we found the viscoelastic  
245 relaxation time reduced to 1 sec, indicating that the stress fibers are predominately fluid-like at all  
246 physiological time scales. Rescue of the *zyxin*<sup>-/-</sup> cells with EGFP-*zyxin* resulted in parameter fits that  
247 were consistent with the NIH 3T3 fibroblast data. Zyxin is thus important for maintaining the  
248 qualitative mechanical response of stress fibers, ensuring they are predominately elastic at ~1 hr time  
249 scales.

250

## 251 Discussion

252 This study demonstrates that the mechanical behavior of adherent cells is strongly shaped by stress  
253 fibers and their ability rapid force transmission and cytoskeletal architecture even in the face of  
254 molecular turnover and flow. Using an optogenetic probe to locally activate RhoA via recruitment of  
255 the DH domain of LARG, a RhoA specific GEF, we find that we can stimulate a local contraction in stress  
256 fibers due to an increased accumulation of actin and myosin in the activation area (Figure 6, 1). This  
257 local contraction causes a tension gradient and a flow towards the activation region (Figure 6, 2). The  
258 flow of myosin and  $\alpha$ -actinin increases the strain both on the interface coupling the stress fiber to the  
259 adhesion and in the activation region, leading to recruitment of the mechanosensitive protein zyxin  
260 (Figure 6, 3). When local activation of RhoA is stopped, the system relaxes to the pre-activation state,  
261 mainly driven by elastic energy accumulated in the strained regions, and results in a cytoskeletal flow  
262 of material away from the local activation region (Figure 6, 4).

263

264 This elastic behavior is dependent on zyxin. Previous reports have shown that zyxin localizes along the  
265 stress fiber at the interface of the adhesion<sup>50,51</sup>. This positioning suggests that previously reported  
266 zyxin mediated stress fiber repair mechanisms<sup>46,49</sup> are also occurring at the adhesion interface as actin  
267 is assembled and is incorporated into the stress fiber while under tension. The localization of zyxin to  
268 sites of compression, however, is novel. While it is known that the LIM domain of zyxin is sufficient for  
269 localization<sup>52</sup>, the exact mechanism through which zyxin recognizes sites of strain remains unknown.

270

271 These data further illustrate that RhoA activity and its downstream effectors are tightly regulated by  
272 the cell. We see no evidence that RhoA activation alone leads to *de novo* stress fiber formation or  
273 adhesion maturation. Instead these processes likely result from concurrent changes in cytoskeletal  
274 architecture<sup>35,53</sup>. More interestingly, the data suggest cells regulate total RhoA activity to maintain a  
275 constant homeostasis<sup>36-38</sup>. Specifically, the relaxation kinetics of the downstream effectors match the  
276 kinetics of the optogenetic probe<sup>28</sup>, thus indicating that there is no positive feedback loop whereby  
277 production of RhoA•GTP alone is sufficient to promote further activation of RhoA. To sustain a given  
278 contractile state, therefore, the cell must actively regulate and maintain a specific RhoA•GTP  
279 concentration.

280

281 By using an optogenetic approach to perturb the local mechanical balance within the cell, we were  
282 able probe the material properties of the cytoskeleton in ways previously inaccessible. Given that  
283 typical turnover rates for proteins in the cytoskeleton are on the order of tens of seconds<sup>15</sup>, it is  
284 surprising that the cell behaves elastically on timescales of ~1 hour. The viscous behavior of cells is  
285 typically associated with irreversible changes brought on through remodeling and dynamic activity of  
286 proteins (e.g. cytoskeletal remodeling during migration)<sup>21,54,55</sup>. Conversely, elasticity has typically been  
287 used to describe cellular material properties that ignore the dynamic activity of the components<sup>36,56,57</sup>.  
288 The finding that cells can maintain their elasticity and their dynamic activity simultaneously has  
289 exciting implications for interpreting the underlying physics of active materials. The fact that this  
290 behavior can be controlled by the activity of a single protein suggests intriguing potential mechanisms  
291 to regulate cell mechanics during morphogenesis and development.

## 292 **Methods**

### 293 **Cell culture and transfection**

294 NIH 3T3 fibroblasts (American Type Culture Collection, Manassas, VA) were cultured in DMEM media  
295 (Mediatech, Herndon, VA) and supplemented with 10% FBS (HyClone; ThermoFisher Scientific,  
296 Hampton, NH), 2 mM L-glutamine (Invitrogen, Carlsbad, CA) and penicillin-streptomycin (Invitrogen).  
297 Zyxin<sup>-/-</sup> and zyxin<sup>-/-</sup>+EGFP-zyxin Mouse Embryonic Fibroblast cells were a gift of Mary Beckerle's lab  
298 (University of Utah, Salt Lake City, UT) and cultured similarly to the NIH 3T3 fibroblasts<sup>49</sup>. All cells were  
299 transiently transfected via electroporation 24 hrs prior to experiment using a Neon Transfection  
300 system (ThermoFisher Scientific). Following transfection, cells were plated on glass coverslips and  
301 imaged the next day.

302

### 303 **Drug treatments**

304 Cells were treated with either the 10 μM SMIFH2 a pan-formin inhibitor<sup>31</sup> or 1μM of Y-27632 which  
305 inhibits ROCK (ThermoFisher Scientific), for at least 30 minutes prior to imaging.

306

### 307 **Plasmids**

308 The optogenetic membrane tether consisting of Stargazin-GFP-LOVpep and prGEF constructs used are  
309 previously described (Wagner 2016). prGEF-YFP was constructed in an identical manner to prGEF with  
310 YFP replacing mCherry. This construct was used in experiments where the effects on various  
311 downstream markers were visualized. To examine effects on the actin and myosin networks, we used  
312 mApple-Actin and mApple-MLC constructs (gifts from M Davidson, University of Florida, Gainesville FL),  
313 mCherry-Vinculin (gift from V Weaver, University of California at San Francisco, San Francisco, CA) and  
314 mCherry-zyxin (gift from M Beckerle, University of Utah, Salt Lake City, UT).

315

### 316 **Live cell imaging**

317 Glass coverslips were placed in a Chamlide magnetic chamber (Live Cell Instrument, Seoul, Korea) in  
318 culture media supplemented with 10 mM HEPES and 30μL/mL Oxyrase (Oxyrase Inc., Mansfield, OH)  
319 and maintained at 37°C. Cells were imaged on an inverted Nikon Ti-E microscope (Nikon, Melville, NY)  
320 with a Yokogawa CSU-X confocal scanhead (Yokogawa Electric, Tokyo, Japan), and laser merge module

321 containing 491nm, 561nm, and 642nm laser lines (Spectral Applied Research, Ontario, Canada). Images  
322 were collected on either a CoolSNAP HQ2 CCD (Roper Scientific, Trenton, NJ) or Zyla 4.2 sCMOS  
323 Camera (Andor, Belfast, United Kingdom). Local recruitment using the optogenetic probe was  
324 performed using a 405 nM laser coupled to a Mosaic digital micromirror device (Andor). Images were  
325 collected using a 60x 1.49 NA ApoTIRF oil immersion objective (Nikon). All hardware was controlled  
326 using MetaMorph Automation and Image Analysis Software (Molecular Devices, Sunnyvale, CA).

327

328 Unless otherwise stated, cells were imaged in the 561 channel every 20 s for 45 min, with the first 15  
329 min used to determine the steady state of the system, the second 15 min to perform local recruitment,  
330 and the final 15 min to record any recovery. During recruitment a local region drawn in MetaMorph  
331 was illuminated by the 405nm laser for 960 ms at a power  $< 1 \mu\text{J/s}$  immediately prior to the acquisition  
332 of each 561 image.

333

#### 334 **Local recruitment analysis**

335 All data analysis was performed using MATLAB (Mathworks, Natick, MA). Regions of interest (ROIs)  
336 were drawn to calculate the average intensity in the local recruitment region, a control area within the  
337 cell but far away from the recruitment area, and a background area outside of the cell. The average  
338 background intensity was subtracted from the control region and this curve was used to determine a  
339 photobleaching correction. The photobleaching correction was then applied to the background  
340 subtracted average intensity in the local recruitment region and normalized to the average value of the  
341 first 15 min of the data.

342

#### 343 **Focal adhesion analysis**

344 Images were thresholded and segmented to create binary masks using MATLAB. Adhesion masks were  
345 filtered to exclude adhesions smaller than  $0.4 \mu\text{m}^2$  due to the inability to segment them consistently.  
346 The binary mask was then used to calculate the total number and average fluorescence intensity of  
347 adhesions in each frame. These masks were also used to calculate the average stress under the  
348 adhesions. To calculate the percentage of adhesions which increased in intensity or stress during  
349 activation, we compared the maximum intensity of the adhesion during activation to the intensity

350 immediately prior to activation. Adhesions were considered to have shown an increase in either  
351 intensity or stress if the magnitude of the increase was greater than 10%.

352

### 353 **Kymograph and local displacement analysis**

354 Kymographs were created in MATLAB by drawing lines along stress fibers and averaging across a width  
355 of 9 pixels. Local displacement was determined by locating a feature 5 $\mu$ m from the edge of the  
356 activation zone in a kymograph immediately prior to activation. The location of this feature was then  
357 tracked and recorded following the 15 minute period of activation, and then again following 15  
358 minutes of relaxation.

359

### 360 **Cytoskeletal flow analysis**

361 Images were first corrected for bleaching and then filtered with a 3D Gaussian filter to remove noise.  
362 Flow fields were calculated using an implementation of the Brox et al. optical flow algorithm<sup>39,40</sup> that  
363 ensures spatial and temporal smoothness. Flow field kymographs were generated by projecting the  
364 flow vectors onto the line defining the kymograph. To compare the direction of flow with the  
365 organization of the cytoskeleton, the local orientation of actin fibers was extracted from the structure  
366 tensor<sup>58</sup>.

367

### 368 **$\alpha$ -actinin spacing analysis**

369 Kymographs were drawn as above. For each timepoint in the kymograph, local peaks in the linescan  
370 were determined. Peaks were then connected to create tracks across the kymograph. Local velocity  
371 was determined by isolating the section of the track during the activation period and fitting the  
372 trajectory to a straight line. The fitted slope was taken as the velocity.

373

### 374 **Traction force microscopy**

375 Traction force microscopy was performed as described previously<sup>33,34,36</sup>. Briefly, polyacrylamide gels  
376 embedded with 40-nm fluorescent microspheres (Invitrogen) were polymerized on activated glass  
377 coverslips. The shear modulus of the gels used in these experiments was 8.6 kPa. Following  
378 polymerization gels were washed with PBS and crosslinked with the extracellular matrix protein

379 fibronectin (Millipore, Billerica, MA) using the photoactivatable crosslinker sulfo-sanpah (Thermo  
380 Fisher Scientific). Cells were plated and allowed to spread for at least 4 hours prior to imaging as  
381 described above.

382

383 Following imaging, cells were removed from the substrate using 0.5% sodium dodecyl sulfate and a  
384 reference image of the fluorescent beads in the unstrained substrate was taken. The image stack was  
385 then aligned to correct for drift and compared to the reference image using particle imaging  
386 velocimetry to create a displacement field with a grid spacing of 0.86  $\mu\text{m}$ . Displacement vectors were  
387 filtered and interpolated using the Kriging interpolation method. Traction stresses were reconstructed  
388 via Fourier Transform Traction Cytometry<sup>33,59</sup>, with a regularization parameter chosen by minimizing  
389 the L2 curve<sup>34</sup>. The strain energy was calculated as one half the integral of the traction stress field  
390 dotted into the displacement field<sup>36</sup>.

391

### 392 **Statistical analysis**

393 All experiments were repeated a minimum of 3 times. Cells presented in figures are representative  
394 samples of the population behavior. Box plots represent the 25<sup>th</sup>, 50<sup>th</sup> and 75<sup>th</sup> percentiles of the data.  
395 Whiskers on the boxplot extend to the most extreme data points not considered outliers. Error bars  
396 represent the standard deviation, except where noted otherwise. Statistical significance was  
397 determined using independent two-sample Student's *t* tests of the mean to compare groups of data.  
398 Statistical significance is indicated by asterisks: (\*) represents a *p*-value < 0.05; (\*\*) represents a *p*-  
399 value < 0.01.

400



401 References:

- 402 1. Lecuit, T., Lenne, P.-F. & Munro, E. Force generation, transmission, and integration during cell  
403 and tissue morphogenesis. *Annu Rev Cell Dev Biol* **27**, 157–184 (2011).
- 404 2. Paluch, E. & Heisenberg, C.-P. Biology and Physics of Cell Shape Changes in Development.  
405 *Current Biology* **19**, R790–R799 (2009).
- 406 3. Iskratsch, T., Wolfenson, H. & Sheetz, M. P. Appreciating force and shape—the rise of  
407 mechanotransduction in cell biology. *Nat Rev Mol Cell Biol* **15**, 825–833 (2014).
- 408 4. Murrell, M., Oakes, P. W., Lenz, M. & Gardel, M. L. Forcing cells into shape: the mechanics of  
409 actomyosin contractility. *Nat Rev Mol Cell Biol* **16**, 486–498 (2015).
- 410 5. Martin, A. C., Gelbart, M., Fernandez-Gonzalez, R., Kaschube, M. & Wieschaus, E. F. Integration  
411 of contractile forces during tissue invagination. *J Cell Biol* **188**, 735–749 (2010).
- 412 6. Wagner, E. & Glotzer, M. Local RhoA activation induces cytokinetic furrows independent of  
413 spindle position and cell cycle stage. *J Cell Biol* **213**, 641–649 (2016).
- 414 7. Melvin, A. T., Welf, E. S., Wang, Y., Irvine, D. J. & Haugh, J. M. In chemotaxing fibroblasts, both  
415 high-fidelity and weakly biased cell movements track the localization of PI3K signaling. *Biophys J*  
416 **100**, 1893–1901 (2011).
- 417 8. Plotnikov, S. V. & Waterman, C. M. Guiding cell migration by tugging. *Curr Opin Cell Biol* **25**, 619–  
418 626 (2013).
- 419 9. McBeath, R., Pirone, D. M., Nelson, C. M., Bhadriraju, K. & Chen, C. S. Cell shape, cytoskeletal  
420 tension, and RhoA regulate stem cell lineage commitment. *Dev Cell* **6**, 483–495 (2004).
- 421 10. Wang, A. *et al.* Nonmuscle myosin II isoform and domain specificity during early mouse  
422 development. *Proc. Natl. Acad. Sci. U.S.A.* **107**, 14645–14650 (2010).
- 423 11. Müller, T. *et al.* Non-muscle myosin IIA is required for the development of the zebrafish  
424 glomerulus. *Kidney Int.* **80**, 1055–1063 (2011).
- 425 12. Schwarz, U. S. & Gardel, M. L. United we stand - integrating the actin cytoskeleton and cell-  
426 matrix adhesions in cellular mechanotransduction. *J Cell Sci* **125**, 3051–3060 (2012).
- 427 13. Blanchoin, L., Boujemaa-Paterski, R., Sykes, C. & Plastino, J. Actin dynamics, architecture, and  
428 mechanics in cell motility. *Physiol Rev* **94**, 235–263 (2014).
- 429 14. Fletcher, D. A. & Mullins, R. D. Cell mechanics and the cytoskeleton. *Nature* **463**, 485–492  
430 (2010).
- 431 15. Hotulainen, P. & Lappalainen, P. Stress fibers are generated by two distinct actin assembly  
432 mechanisms in motile cells. *J Cell Biol* **173**, 383–394 (2006).
- 433 16. Devreotes, P. & Horwitz, A. R. Signaling Networks that Regulate Cell Migration. *Cold Spring Harb*  
434 *Perspect Biol* **7**, a005959 (2015).
- 435 17. Gardel, M. L., Schneider, I. C., Aratyn-Schaus, Y. & Waterman, C. M. Mechanical integration of  
436 actin and adhesion dynamics in cell migration. *Annu Rev Cell Dev Biol* **26**, 315–333 (2010).
- 437 18. Hoffman, B. D. & Crocker, J. C. Cell mechanics: dissecting the physical responses of cells to force.  
438 *Annu Rev Biomed Eng* **11**, 259–288 (2009).
- 439 19. Stricker, J., Falzone, T. & Gardel, M. L. Mechanics of the F-actin cytoskeleton. *J Biomech* **43**, 9–14  
440 (2010).
- 441 20. Zhu, C., Bao, G. & Wang, N. Cell mechanics: mechanical response, cell adhesion, and molecular  
442 deformation. *Annu Rev Biomed Eng* **2**, 189–226 (2000).
- 443 21. Prost, J., Julicher, F. & Joanny, J.-F. Active gel physics. *Nature Physics* **11**, 111–117 (2015).

- 444 22. Schwarz, U. S. & Safran, S. A. Physics of adherent cells. *Rev Mod Phys* **85**, 1327 (2013).
- 445 23. Broedersz, C. P. & Mackintosh, F. C. Modeling semiflexible polymer networks. *Rev Mod Phys* **86**,
- 446 995 (2014).
- 447 24. Ridley, A. J. & Hall, A. The small GTP-binding protein rho regulates the assembly of focal
- 448 adhesions and actin stress fibers in response to growth factors. *Cell* **70**, 389–399 (1992).
- 449 25. Chrzanowska-Wodnicka, M. & Burridge, K. Rho-stimulated contractility drives the formation of
- 450 stress fibers and focal adhesions. *J Cell Biol* **133**, 1403–1415 (1996).
- 451 26. Machacek, M. *et al.* Coordination of Rho GTPase activities during cell protrusion. *Nature* **461**,
- 452 99–103 (2009).
- 453 27. Pertz, O., Hodgson, L., Klemke, R. L. & Hahn, K. M. Spatiotemporal dynamics of RhoA activity in
- 454 migrating cells. *Nature* **440**, 1069–1072 (2006).
- 455 28. Strickland, D. *et al.* TULIPs: tunable, light-controlled interacting protein tags for cell biology. *Nat*
- 456 *Methods* **9**, 379–384 (2012).
- 457 29. Guilluy, C. *et al.* The Rho GEFs LARG and GEF-H1 regulate the mechanical response to force on
- 458 integrins. *Nat Cell Biol* **13**, 722–727 (2011).
- 459 30. Jaiswal, M. *et al.* Mechanistic insights into specificity, activity, and regulatory elements of the
- 460 regulator of G-protein signaling (RGS)-containing Rho-specific guanine nucleotide exchange
- 461 factors (GEFs) p115, PDZ-RhoGEF (PRG), and leukemia-associated RhoGEF (LARG). *J Biol Chem*
- 462 **286**, 18202–18212 (2011).
- 463 31. Rizvi, S. A. *et al.* Identification and characterization of a small molecule inhibitor of formin-
- 464 mediated actin assembly. *Chem Biol* **16**, 1158–1168 (2009).
- 465 32. Balaban, N. Q. *et al.* Force and focal adhesion assembly: a close relationship studied using elastic
- 466 micropatterned substrates. *Nat Cell Biol* **3**, 466–472 (2001).
- 467 33. Sabass, B., Gardel, M., Waterman, C. M. & Schwarz, U. S. High resolution traction force
- 468 microscopy based on experimental and computational advances. *Biophys J* **94**, 207–220 (2008).
- 469 34. Soiné, J. R. D. *et al.* Model-based Traction Force Microscopy Reveals Differential Tension in
- 470 Cellular Actin Bundles. *PLoS Comput Biol* **11**, e1004076 (2015).
- 471 35. Oakes, P. W., Beckham, Y., Stricker, J. & Gardel, M. L. Tension is required but not sufficient for
- 472 focal adhesion maturation without a stress fiber template. *J Cell Biol* **196**, 363–374 (2012).
- 473 36. Oakes, P. W., Banerjee, S., Marchetti, M. C. & Gardel, M. L. Geometry regulates traction stresses
- 474 in adherent cells. *Biophys J* **107**, 825–833 (2014).
- 475 37. Ingber, D. E. Tensegrity I. Cell structure and hierarchical systems biology. *J Cell Sci* **116**, 1157–
- 476 1173 (2003).
- 477 38. Webster, K. D., Ng, W. P. & Fletcher, D. A. Tensional Homeostasis in Single Fibroblasts. *Biophys J*
- 478 **107**, 146–155 (2014).
- 479 39. Brox, T., Bruhn, A., Papenberg, N. & Weickert, J. in *Computer Vision - ECCV 2004* 25–36 (Springer
- 480 Berlin Heidelberg, 2004). doi:10.1007/978-3-540-24673-2\_3
- 481 40. Sánchez, J., Monzón, N. & Salgado, A. Robust Optical Flow Estimation. *Image Processing On Line*
- 482 **3**, 252–270 (2013).
- 483 41. Cai, Y. *et al.* Cytoskeletal coherence requires myosin-IIA contractility. *J Cell Sci* **123**, 413–423
- 484 (2010).
- 485 42. Xu, K., Babcock, H. P. & Zhuang, X. Dual-objective STORM reveals three-dimensional filament
- 486 organization in the actin cytoskeleton. *Nat Methods* **9**, 185–188 (2012).
- 487 43. Colombelli, J. *et al.* Mechanosensing in actin stress fibers revealed by a close correlation

- 488 between force and protein localization. *J Cell Sci* **122**, 1665–1679 (2009).
- 489 44. Yoshigi, M., Hoffman, L. M., Jensen, C. C., Yost, H. J. & Beckerle, M. C. Mechanical force mobilizes  
490 zyxin from focal adhesions to actin filaments and regulates cytoskeletal reinforcement. *J Cell Biol*  
491 **171**, 209–215 (2005).
- 492 45. Zaidel-Bar, R., Ballestrem, C., Kam, Z. & Geiger, B. Early molecular events in the assembly of  
493 matrix adhesions at the leading edge of migrating cells. *J Cell Sci* **116**, 4605–4613 (2003).
- 494 46. Smith, M. A. *et al.* LIM domains target actin regulators paxillin and zyxin to sites of stress fiber  
495 strain. *PLoS ONE* **8**, e69378 (2013).
- 496 47. Smith, M. A., Hoffman, L. M. & Beckerle, M. C. LIM proteins in actin cytoskeleton  
497 mechanoresponse. *Trends Cell Biol* **24**, 575–583 (2014).
- 498 48. Hoffman, L. M. *et al.* Genetic ablation of zyxin causes Mena/VASP mislocalization, increased  
499 motility, and deficits in actin remodeling. *J Cell Biol* **172**, 771–782 (2006).
- 500 49. Smith, M. A. *et al.* A zyxin-mediated mechanism for actin stress fiber maintenance and repair.  
501 *Dev Cell* **19**, 365–376 (2010).
- 502 50. Guo, W.-H. & Wang, Y.-L. Retrograde fluxes of focal adhesion proteins in response to cell  
503 migration and mechanical signals. *Mol Biol Cell* **18**, 4519–4527 (2007).
- 504 51. Kanchanawong, P. *et al.* Nanoscale architecture of integrin-based cell adhesions. *Nature* **468**,  
505 580–584 (2010).
- 506 52. Uemura, A., Nguyen, T.-N., Steele, A. N. & Yamada, S. The LIM domain of zyxin is sufficient for  
507 force-induced accumulation of zyxin during cell migration. *Biophys J* **101**, 1069–1075 (2011).
- 508 53. Aratyn-Schaus, Y., Oakes, P. W. & Gardel, M. L. Dynamic and structural signatures of lamellar  
509 actomyosin force generation. *Mol Biol Cell* **22**, 1330–1339 (2011).
- 510 54. Callan-Jones, A. C. & Voituriez, R. Active gel model of amoeboid cell motility. *New J Phys* **15**,  
511 025022 (2013).
- 512 55. Besser, A. & Schwarz, U. S. Coupling biochemistry and mechanics in cell adhesion: a model for  
513 inhomogeneous stress fiber contraction. *New J Phys* **9**, 425 (2007).
- 514 56. Edwards, C. M. & Schwarz, U. S. Force localization in contracting cell layers. *Phys Rev Lett* **107**,  
515 128101 (2011).
- 516 57. Farsad, M. & Vernerey, F. J. An XFEM-based numerical strategy to model mechanical  
517 interactions between biological cells and a deformable substrate. *Int J Numer Meth Engng* **92**,  
518 238–267 (2012).
- 519 58. Weichsel, J., Urban, E., Small, J. V. & Schwarz, U. S. Reconstructing the orientation distribution of  
520 actin filaments in the lamellipodium of migrating keratocytes from electron microscopy  
521 tomography data. *Cytometry A* **81**, 496–507 (2012).
- 522 59. Butler, J. P., Tolić-Nørrelykke, I. M., Fabry, B. & Fredberg, J. J. Traction fields, moments, and  
523 strain energy that cells exert on their surroundings. *Am J Physiol Cell Physiol* **282**, C595–605  
524 (2002).
- 525

526

527 **Figure Captions**

528 **Figure 1**

529 RhoA activity can be spatiotemporally controlled via an optogenetic probe. **(a)** Spatiotemporal control  
530 of RhoA activity is achieved using an optogenetic probe to recruit the RhoA specific GEF LARG to the  
531 plasma membrane. A LOVpep molecule is anchored to the membrane via fusion to the transmembrane  
532 protein Stargazin, while a protein consisting of tandem PDZ domains fused to the DH domain of LARG  
533 (prGEF) is distributed throughout the cytosol. Upon stimulation with 405nm light, the LOVpep  
534 undergoes a conformational change exposing a high-affinity binding site which drives the prGEF to the  
535 membrane where it can activate RhoA. When the activating light is removed, the LOVpep undergoes a  
536 thermodynamically driven refolding halting further recruitment of prGEF. **(b)** The RhoA signaling  
537 pathway. RhoA\*GTP activates both Dia and ROCK, which in turn promote actin polymerization and  
538 myosin II activation, respectively. **(c)** Representative images of a 3T3 fibroblast expressing an mCherry-  
539 tagged version of prGEF. Upon local activation (top row – orange box) mCherry-prGEF rapidly  
540 accumulates in the activation region. Removal of the activating light (bottom row) results in the  
541 accumulated mCherry-prGEF dispersing back into the cytosol. **(d)** Quantification of the local intensity  
542 increase of mCherry-prGEF in the activation region of the cell shown in **c**. The activation period is  
543 indicated by a blue background. **(e-f)** Representative images of cells expressing either mApple-Actin **(e)**  
544 or mApple-Myosin Light Chain **(f)** prior to activation, following 15 minutes of activation in the region  
545 indicated, and following 15 minutes of relaxation. Both actin and myosin exhibit increases in intensity  
546 in the local region of activation. **(g)** Quantification of the local intensity increase of actin and myosin  
547 from the cells in **e-f**. Both signals begin increasing immediately upon RhoA activation, and dissipate as  
548 soon as the activating light is switched off. **(h)** Mean maximum intensity fold-increase of actin or  
549 myosin in regions of activation in control cells, or cells treated with 10  $\mu$ M SMIFH2 (Dia inhibitor) or  
550 1 $\mu$ M Y-27632 (ROCK inhibitor). Inhibition of either Dia or ROCK results in reduced average increases in  
551 local intensity during RhoA activation. Time is min:sec.

552

553 **Figure 2**

554 Increased RhoA activity leads to increased cell contractility. **(a)** A cell expressing mCherry-Vinculin is  
555 shown prior to activation, after 15 minutes of activation, and after 15 minutes of relaxation. The

556 activation region is indicated by the orange box. **(b)** The corresponding traction stress maps for the  
557 time series shown in **a**. **(c)** A plot showing the strain energy versus time and the number of focal  
558 adhesions versus time, with the activation period indicated by the blue background. The strain energy  
559 begins to increase immediately upon activation, and begins to relax as soon as the activating light is  
560 removed. In contrast, the number of focal adhesions remains relatively constant and does not respond  
561 to the local increase in RhoA activity. **(d)** The average stress and fluorescence intensity of a  
562 representative adhesion marked by the white box in **a**. Kymographs were generated by drawing a line  
563 along the long axis of the adhesion. The activation period is indicated by the orange bar above the  
564 kymograph. **(e)** A sequence of traction maps from a cell exposed to a series of activations in regions of  
565 different size. Time is hr:min:sec. **(f)** A plot of the experimental (black line) and theoretical (red line)  
566 strain energy vs time for the cell shown in **e**. The contractile response of the cell is proportional to the  
567 size of the activation region and retreats to a baseline value following each activation period. **(g)** A  
568 cartoon of the continuum model used to describe the cell in **e**. The model consists of a contractile  
569 element ( $\sigma_m$ ) in series with a viscous ( $\eta$ ) and an elastic element ( $k$ ), connected via a frictional elements  
570 ( $\gamma$ ) to an elastic substrate ( $k_M$ ).

571

### 572 **Figure 3**

573 Stress fibers direct contractile flow. **(a)** Fluorescence time series of a cell expressing mApple-MLC  
574 shown prior and after two separate periods of activation (orange boxes). **(b)** Flow fields of myosin  
575 calculated from the images in **a**. Flow is always directed along the direction of the stress fibers. **(c)** A  
576 two dimensional model of the cell was created using a triangular mesh of viscoelastic-cables ( $k, \eta$ )  
577 connected at vertices viscously coupled ( $\gamma$ ) to the environment. Stress fibers (blue line) consisting of  
578 contractile ( $\sigma_m$ ), viscous ( $\eta_{SF}$ ) and elastic elements ( $k_{SF}$ ) were embedded in the network. Using a  
579 simplified rectangular cell with this network, local RhoA activation could be simulated by activating  
580 force dipoles in network links in a region in the center of the cell. **(d)** To calibrate the 2D discrete  
581 model, the average flow (white box in **c**), was measured and compared to the 1D continuum model  
582 presented above. **(e-f)** The 2D discrete model was used to explore two contractile scenarios: **(e)**  
583 contractile stress fibers (blue) embedded in a contractile mesh (grey); and **(f)** contractile stress fibers  
584 embedded in a non-contractile background. If both the stress fibers and mesh are contractile, a

585 transverse contraction pinches together the stress fibers. If only the stress fibers contract, the flow  
586 profile is restricted to the orientation of the fibers, mimicking the experimental results.

587

#### 588 **Figure 4**

589 Stress fibers behave elastically. **(a)** Image showing a cell labeled with mApple-MLC. The activation  
590 regions are indicated by the orange boxes. **(b)** A kymograph drawn along the stress fiber (green line in  
591 **a**). During activation periods myosin flows towards the activation regions. **(c)** A kymograph created  
592 from the same region as **b** using the flow maps determined previously. Flow was projected onto the  
593 stress fiber and color coded to indicate speed and direction. This flow map illustrates that during  
594 relaxation periods, myosin flow reverses direction away from the activation periods. **(d)** A  
595 quantification of displacement of stress fibers during contraction and relaxation. Puncta  $\sim 5 \mu\text{m}$  from  
596 the activation zone were tracked and measured following 15 minutes of activation, and again following  
597 15 min of relaxation. Puncta translated about  $3 \mu\text{m}$  from their original position, and relaxed to  $\sim 1 \mu\text{m}$   
598 from their original position elastically. The relaxation response could be further broken into two  
599 groups, one with a strong reversal ( $\sim 80\%$  of their original position) and one with a weak reversal ( $\sim 25\%$   
600 of their original position). **(e)** A cell transfected with mApple- $\alpha$ -actinin. The activation area is indicated  
601 by the orange box. **(f)** A kymograph drawn along the direction indicated in **e**, overlain with tracks of the  
602 individual  $\alpha$ -actinin puncta during activation. **(g)** The velocity of individual puncta along the stress fiber  
603 is measured from the slope of the tracks and plotted against the distance from the activation region.  
604 Adjacent puncta all move at approximately the same speed. Sudden changes in velocity (blue  
605 arrowhead) correlate with what appear to be site of mechanical failure along the stress fiber and the  
606 appearance of new puncta. The black line represents the stress fiber from **f**, while the grey lines are  
607 other stress fibers from the same cell. **(h)** A representative kymograph is fit to both the 1D continuum  
608 and 2D discrete models. Both models are able to recapitulate the flow patterns seen experimentally.

609

#### 610 **Figure 5**

611 Zyxin accumulates at sites of strain on stress fibers during local RhoA activation. **(a)** A NIH 3T3  
612 expressing mCherry-zyxin. The activation region is indicated by the orange box. **(b)** A kymograph of a  
613 representative adhesion marked by the white box in **a**. **(c)** The average intensity of zyxin in the



614 activation region. **(d)** A kymograph illustrating the local zyxin accumulation during activation along the  
615 green line shown in **a**. **(e)** A zyxin<sup>(-/-)</sup> MEF expressing mApple-MLC before activation, at peak activation,  
616 and following relaxation. Myosin accumulates as in 3T3s. **(f)** A kymograph of myosin intensity and flow  
617 speed drawn along the green line indicated in **e**. Zyxin<sup>(-/-)</sup> MEFS exhibit little to no elastic flow reversal.  
618 **(g)** A zyxin<sup>(-/-)</sup> MEF rescued with EGFP-zyxin and expressing mApple-MLC, during an activation  
619 sequence. **(h)** A kymograph of myosin and flow illustrating a strong elastic flow reversal along the line  
620 drawn in **g**. **(i)** Displacement analysis of the zyxin<sup>(-/-)</sup> and zyxin<sup>(-/-)</sup>+EGFP-zyxin MEFs. Without zyxin, cells  
621 do not exhibit an elastic response. **(j)** A kymograph representing the average fit of the continuum  
622 model to the zyxin<sup>(-/-)</sup> data. **(k)** A kymograph representing the average fit of the continuum model to  
623 the zyxin<sup>(-/-)</sup>+EGFP-zyxin data. **(l)** The elastic ( $E$ ) and viscous ( $\eta$ ) parameters found from fitting the  
624 experimental kymographs to the continuum model. Without zyxin, the elasticity increases and the  
625 viscosity decreases.

626

## 627 **Figure 6**

628 Molecular and mechanical models of local RhoA activation in stress fibers. Molecular model: (1) Local  
629 recruitment of prGEF leads to activation of RhoA and accumulation of actin and myosin. The local  
630 increase in actin and myosin in turn stimulates a local contraction in the stress fiber. (2) The increased  
631 local contractility induces a flow of myosin and  $\alpha$ -actinin along the stress fiber towards the activation  
632 region. (3) Increased flow induces higher strain at both the interface coupling the stress fiber to the  
633 focal adhesion and the activation region, resulting in recruitment of the mechanosensitive protein  
634 zyxin. (4) When local activation of RhoA stops, the flow reverses direction as the stress fiber relaxes  
635 elastically. Mechanical model: The stress fiber is represented as a contractile, viscous and elastic  
636 element connected in series. Upon local activation of RhoA, the contractile element is compressed,  
637 leading to extension of both the viscous and elastic elements. As local activation stops, the energy  
638 stored in the elastic element allows it to relax back to its original state, while the energy in the viscous  
639 element is lost.

640

641

642 **Supplementary Movie Captions**

643 **Supplementary Movie 1**

644 A NIH 3T3 fibroblast expressing mCherry-prGEF during a local activation of RhoA (from Figure 1c). Local  
645 activation area is indicated by the white box. Time is in min:sec.

646

647 **Supplementary Movie 2**

648 A NIH 3T3 fibroblast expressing mApple-Actin during local activation of RhoA (from Figure 1e). Local  
649 activation area is indicated by the white box. Time is in min:sec.

650

651 **Supplementary Movie 3**

652 A NIH 3T3 fibroblast expressing mApple-MLC during a local activation of RhoA (from Figure 1f). Local  
653 activation area is indicated by the white box. Time is in min:sec.

654

655 **Supplementary Movie 4**

656 A NIH 3T3 fibroblast expressing mCherry-vinculin during a local activation of RhoA (from Figure 2a) and  
657 the corresponding traction stress maps (from Figure 2b). Local activation is indicated by the white box.  
658 Time is in min:sec.

659

660 **Supplementary Movie 5**

661 Traction stress maps of a NIH 3T3 fibroblast during a series of local RhoA activations (from Figure 2e).  
662 Local activation is indicated by white boxes. Time is in hr:min:sec.

663

664 **Supplementary Movie 6**

665 A NIH 3T3 fibroblast expressing mApple-MLC during a local activation of RhoA and the corresponding  
666 cytoskeletal flow maps (from Figure 3a,b). Local activation is indicated by white boxes. Time is in  
667 hr:min:sec.

668

669

670



671 **Supplementary Movie 7**

672 A NIH 3T3 fibroblast expressing mApple-MLC during 3 sequential local activations of RhoA. Each  
673 activation is the same area but of a different geometry. Local activation is indicated by white boxes.  
674 Time is in hr:min:sec.

675

676 **Supplementary Movie 8**

677 A NIH 3T3 fibroblast expressing mApple- $\alpha$ -actinin during a local activation of RhoA (from Figure 4e).  
678 Local activation is indicated by white boxes. Time is in min:sec.

679

680 **Supplementary Movie 9**

681 A NIH 3T3 fibroblast expressing mCherry-Zyxin during a local activation of RhoA (from Figure 5a). Local  
682 activation is indicated by white boxes. Time is in min:sec.

683

684 **Supplementary Movie 10**

685 A zyxin<sup>(-/-)</sup> Mouse Embryonic Fibroblast expressing mApple-MLC during a local activation of RhoA (from  
686 Figure 5e). Local activation is indicated by white boxes. Time is in min:sec.

687

688 **Supplementary Movie 11**

689 A zyxin<sup>(-/-)</sup>+EGFP-zyxin Mouse Embryonic Fibroblast expressing mApple-MLC during a local activation of  
690 RhoA (from Figure 5g). Local activation is indicated by white boxes. Time is in min:sec.

691

692 **Figure 1**

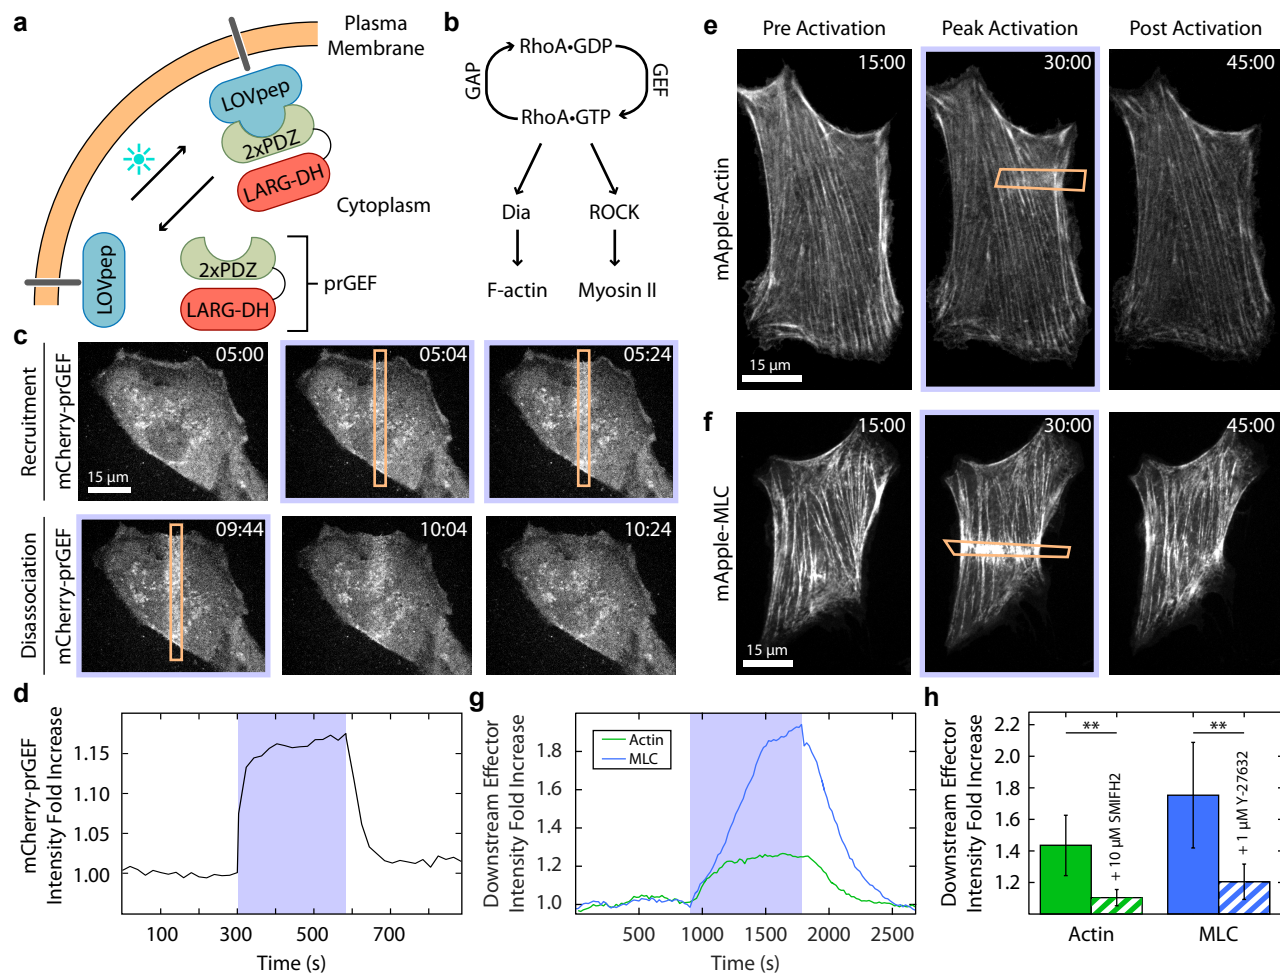

693

694

695 **Figure 2**

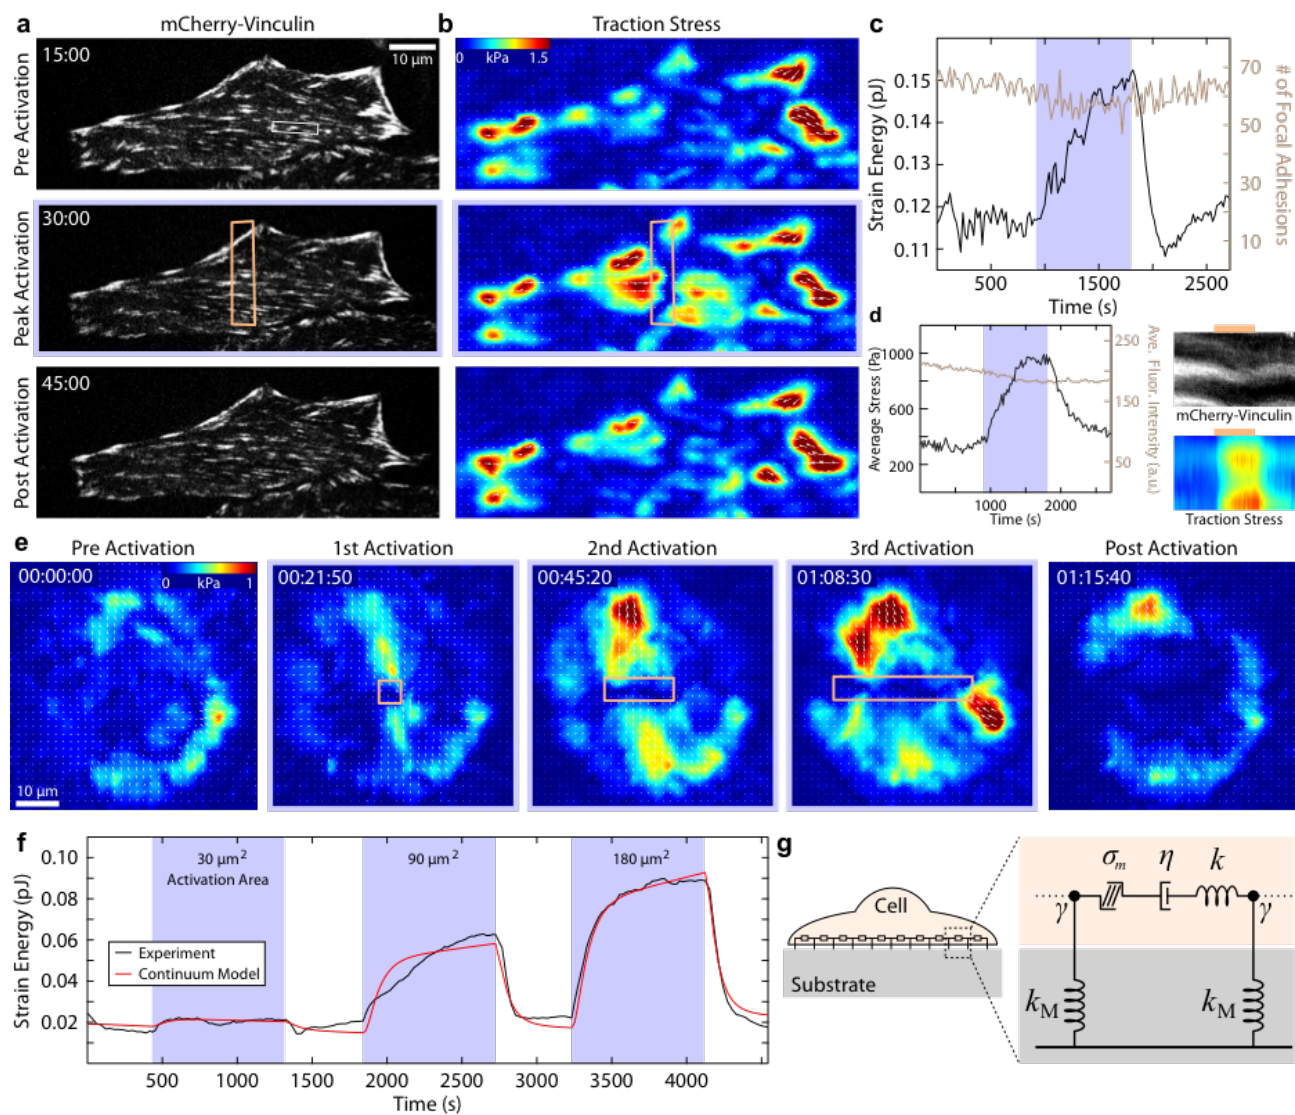

696

697

698 **Figure 3**

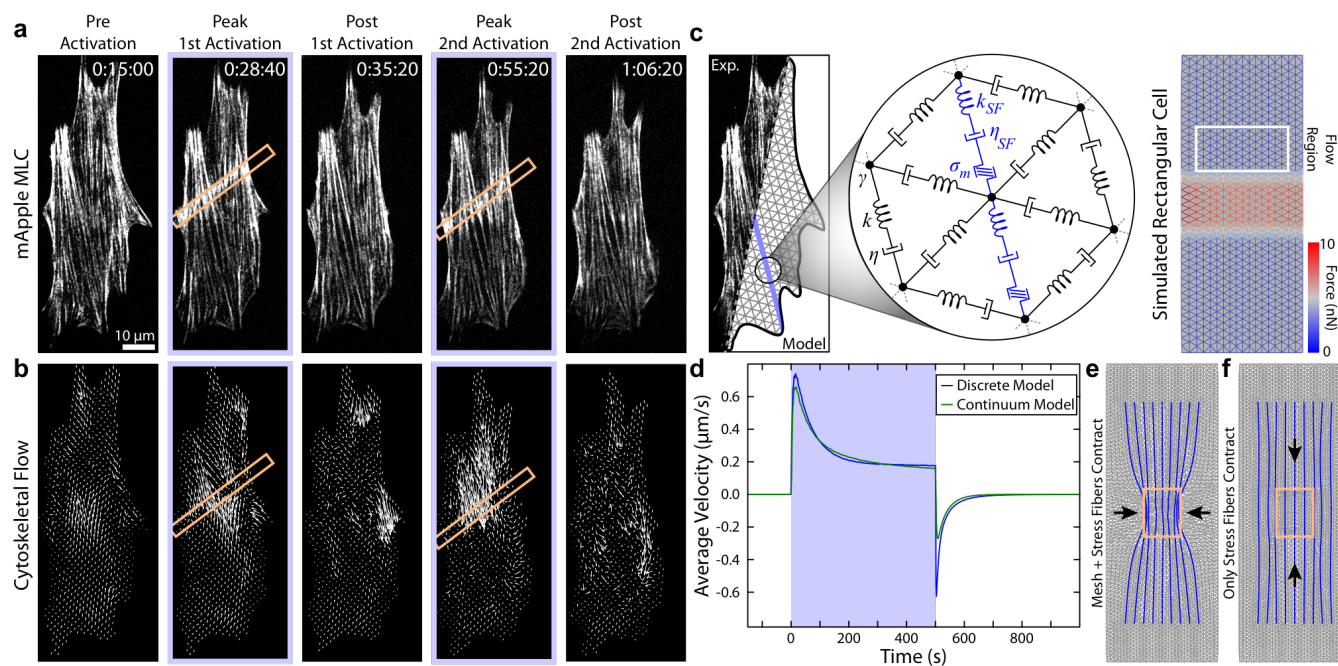

699

700



701 **Figure 4**

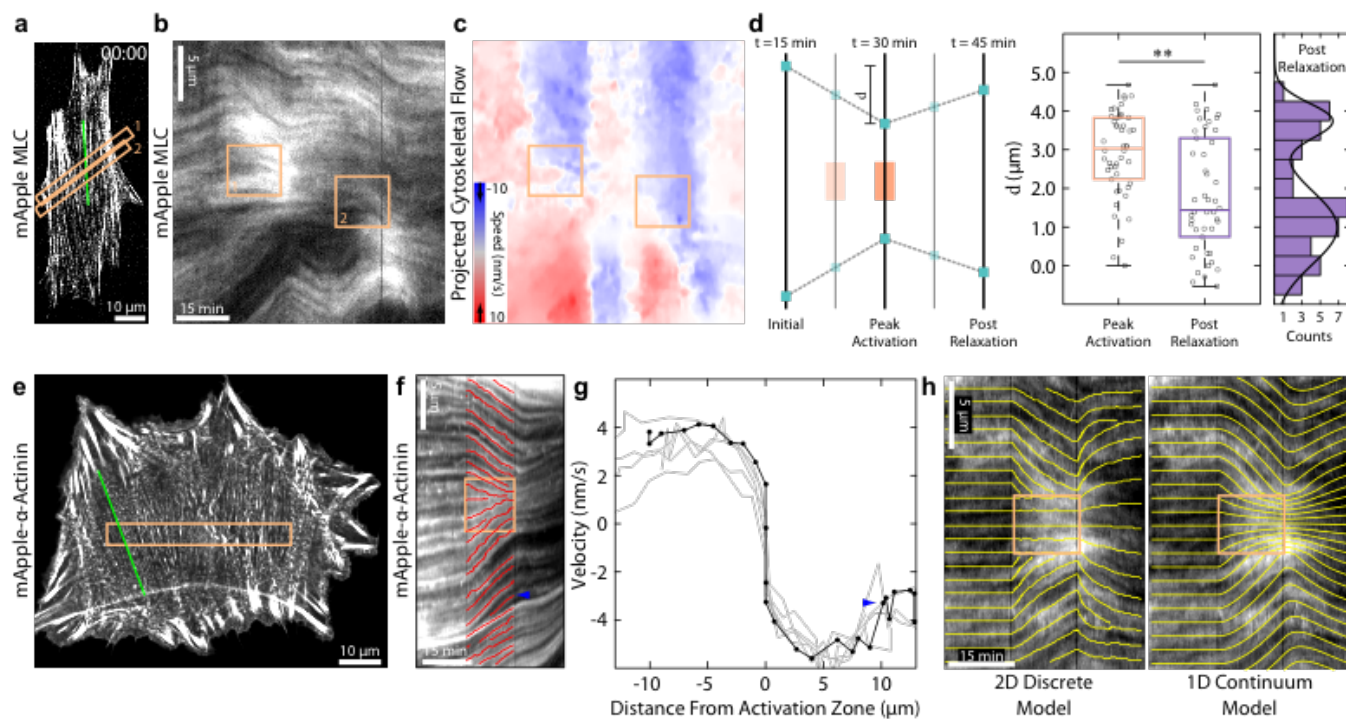

702

703

704 **Figure 5**

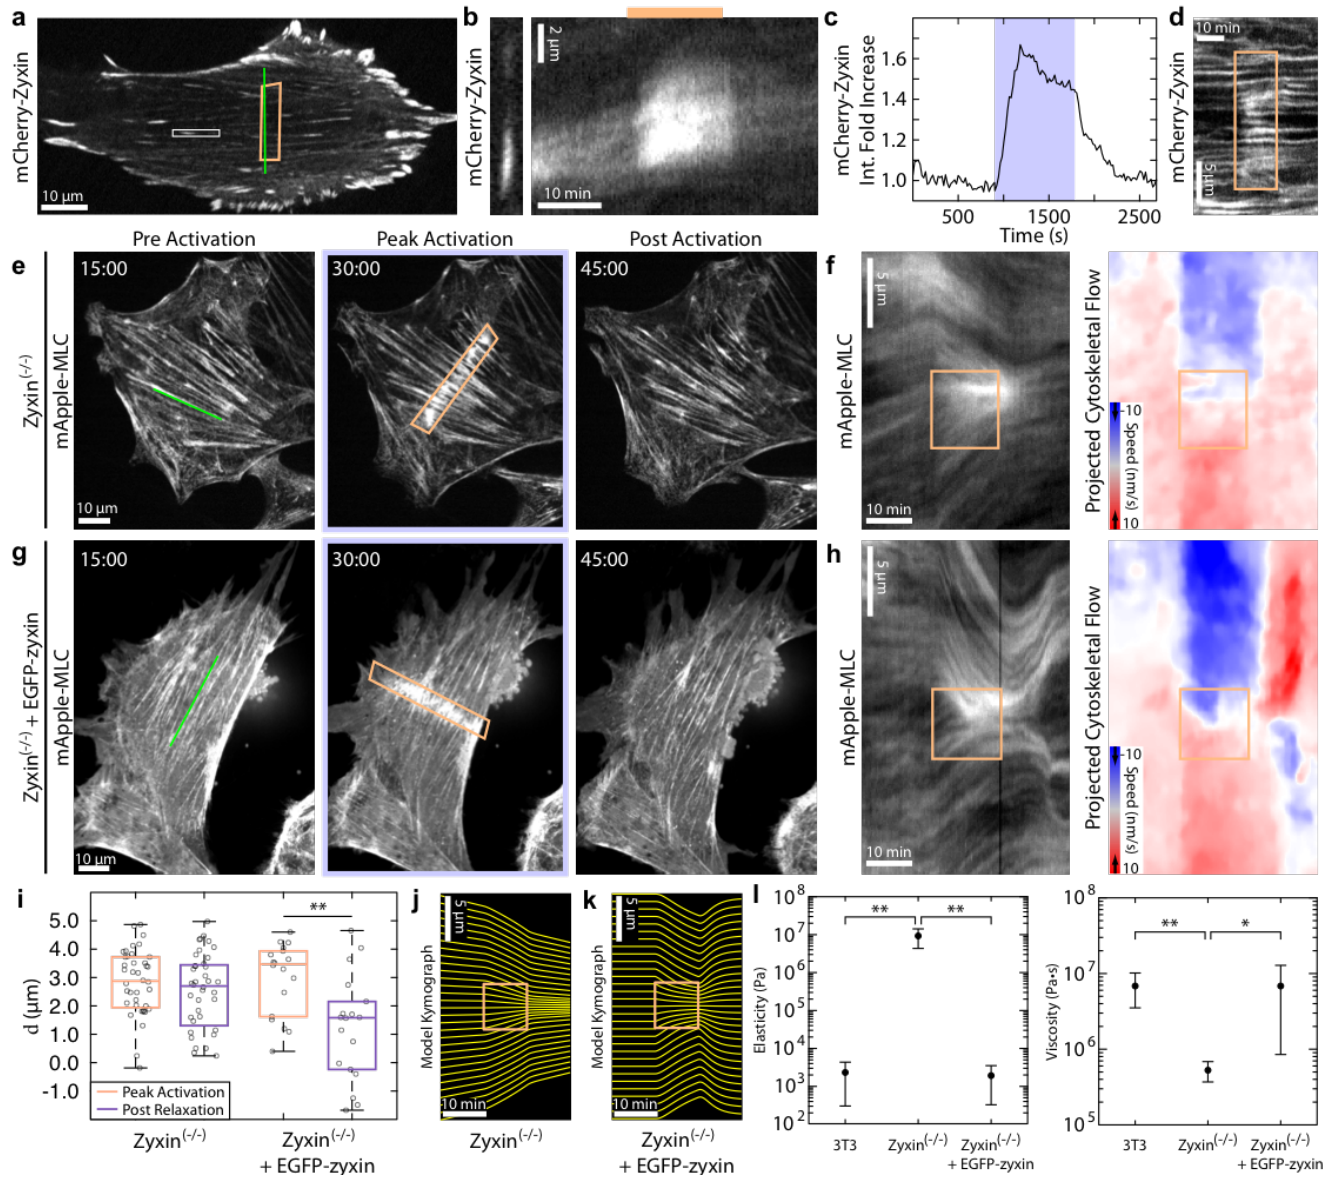

705

706

707 **Figure 6**

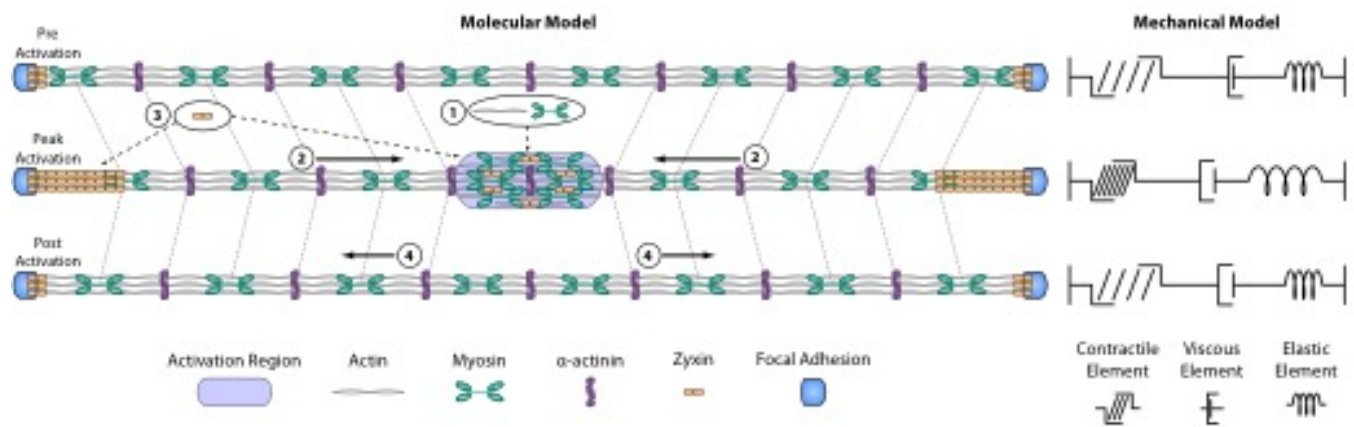

708
